# Supplementary material for: A glycosaminoglycan mimetic peptide nanofiber gel as an osteoinductive scaffold
Source: Royal Society of Chemistry journal article supplement (doi:10.1039/c6bm00179c), 2016-01-01
Supplement: c6bm00179c1.pdf [file c6bm00179c1.pdf]

## Supplementary Information

for

### Glycosaminoglycan mimetic peptide nanofiber gel as an osteoinductive scaffold

Gulistan Tansik<sup>a</sup>, Erden Kilic<sup>b</sup>, Mustafa Beter<sup>a</sup>, Bahtiyar Demiralp<sup>c</sup>, Gullu Kiziltas Sendur<sup>d,e</sup>,  
Nuray Can<sup>f</sup>, Huseyin Ozkan<sup>f</sup>, Elif Ergul<sup>a</sup>, Mustafa O. Guler<sup>a,\*</sup>, Ayse B. Tekinay<sup>a,\*</sup>

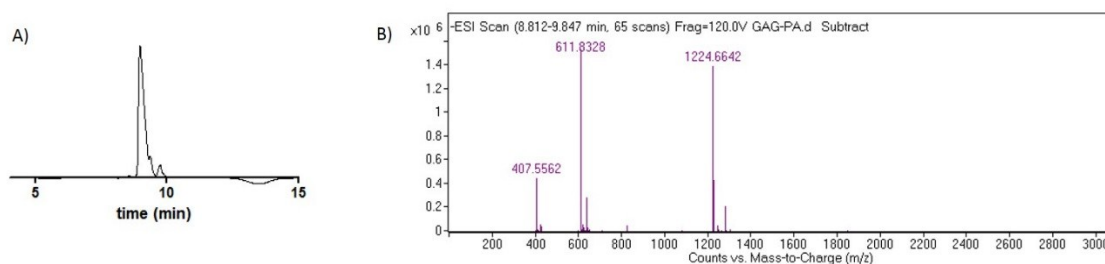

**Fig. S1.** Liquid chromatogram and mass spectrum of GAG-PA. (A) RP-HPLC chromatogram of GAG-PA, the change of response units with respect to time at 220 nm. (B) Mass spectrometry of GAG-PA.  $[M-H]^-$  (calculated): 1225.59  $[M-H]^-$  (observed): 1224.66,  $[M-2H]^{-2}/2$  (calculated): 611.79  $[M-2H]^{-2}/2$  (observed): 611.83  $[M-3H]^{-3}/3$  (calculated): 407.53  $[M-3H]^{-3}/3$  (observed): 407.55.

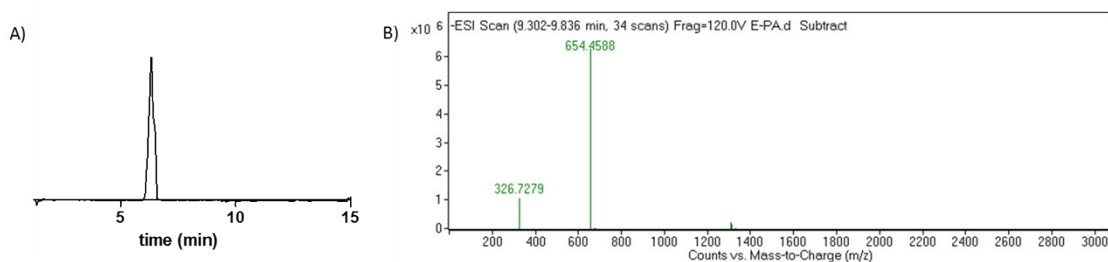

**Fig. S2.** Liquid chromatogram and mass spectrum of E-PA. (A) RP-HPLC chromatogram of E-PA, the change of response units with respect to time at 220 nm. (B) Mass spectrometry of E-PA.  $[M-H]^-$  (calculated): 655.42  $[M-H]^-$  (observed): 654.45,  $[M-2H]^{-2}/2$  (calculated): 326.71  $[M-2H]^{-2}/2$  (observed): 326.72.

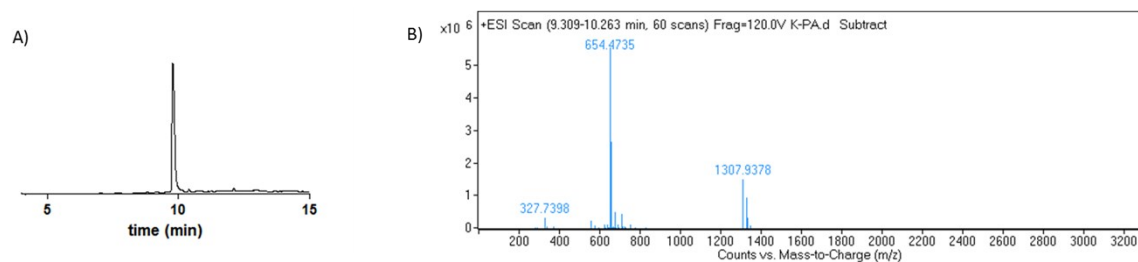

**Fig. S3.** Liquid chromatogram and mass spectrum of K-PA. (A) RP-HPLC chromatogram of K-PA, the change of response units with respect to time at 220 nm. (B) Mass spectrometry of K-PA.  $[M+H]^+$  (calculated):653.48  $[M+H]^+$  (observed): 654.47,  $[2M+H]^+$  (calculated): 1307.96  $[2M+H]^+$  (observed): 1307.93,  $[M+2H]^{+2}/2$  (calculated): 327.74  $[M+2H]^{+2}/2$  (observed): 327.73.

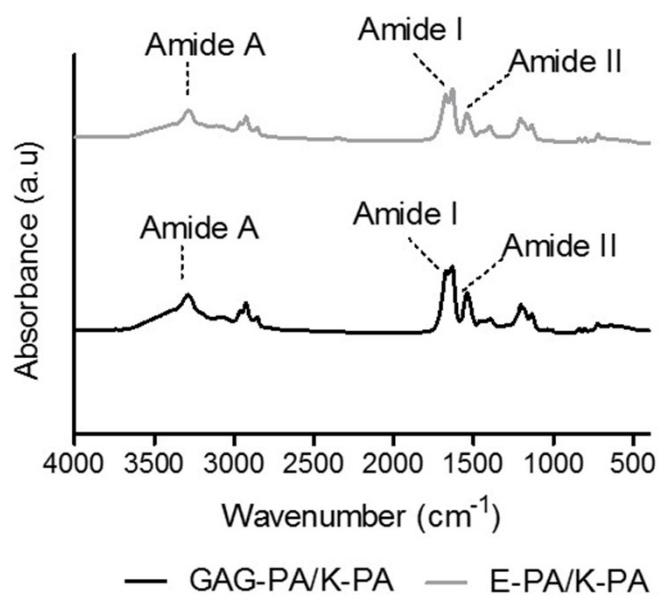

**Fig. S4.** FT-IR spectra of PA nanofibers. Both peptides displayed amide I peaks located in 1630–1640  $\text{cm}^{-1}$  region, suggesting  $\beta$ -sheet formation.

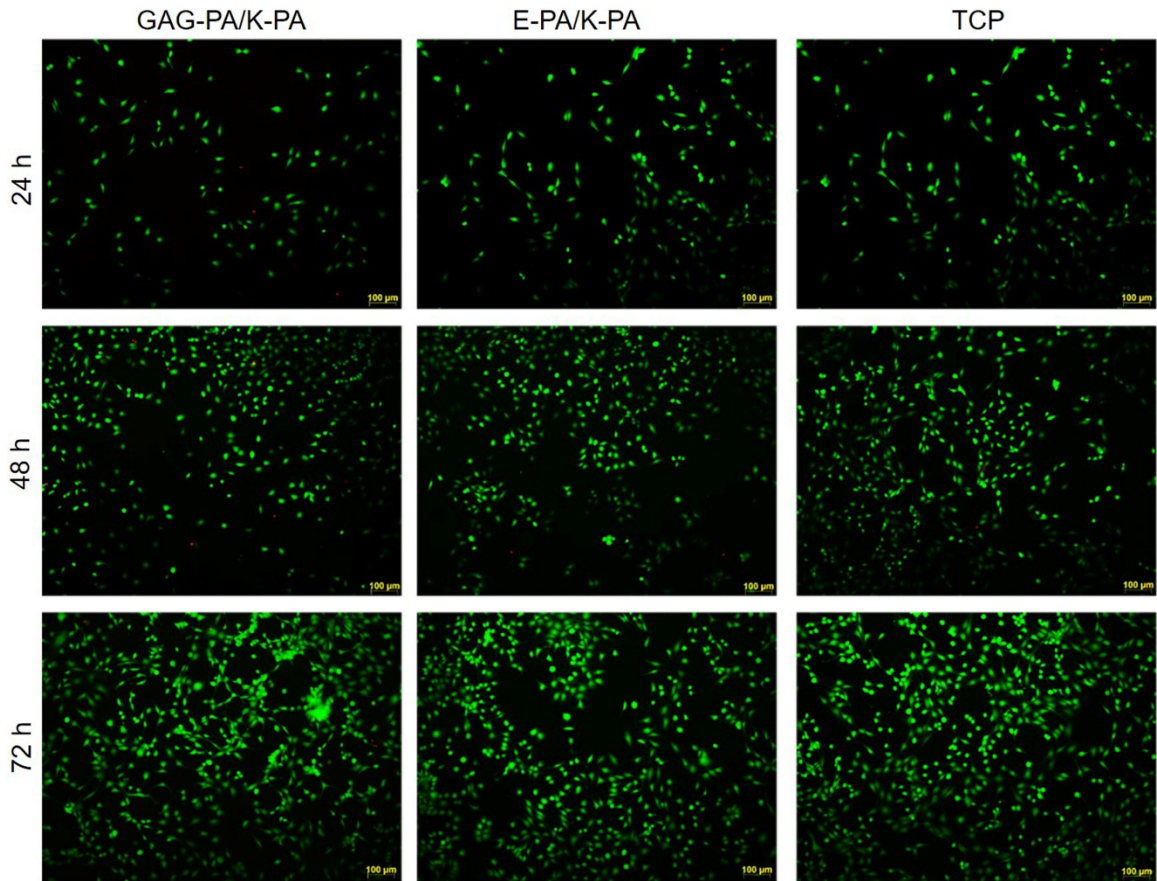

**Fig. S5.** Viability of rMSCs cultured on peptide nanofibers and TCP, analyzed by calcein ethidium homodimer live–dead assay.

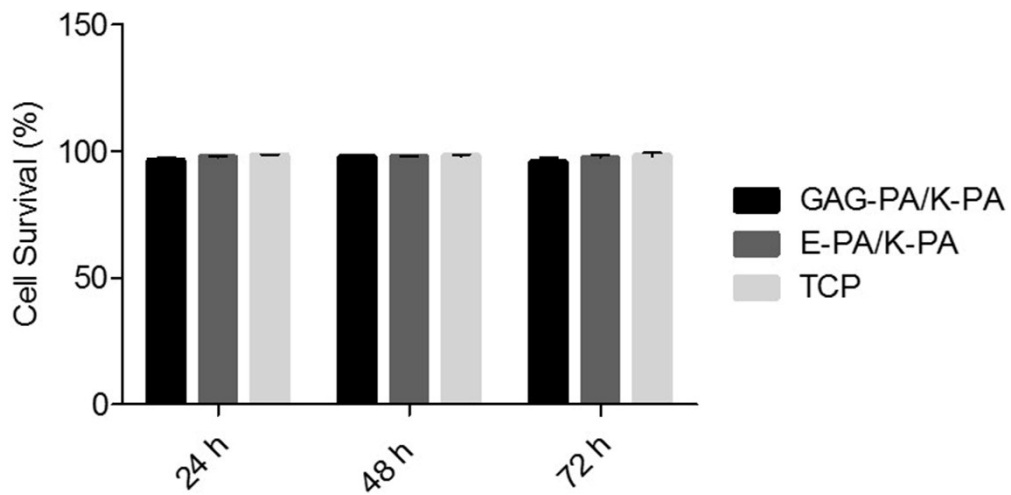

**Fig. S6.** Viability of rMSCs cultured on peptide nanofibers and TCP, analyzed by calcein ethidium homodimer live–dead assay.

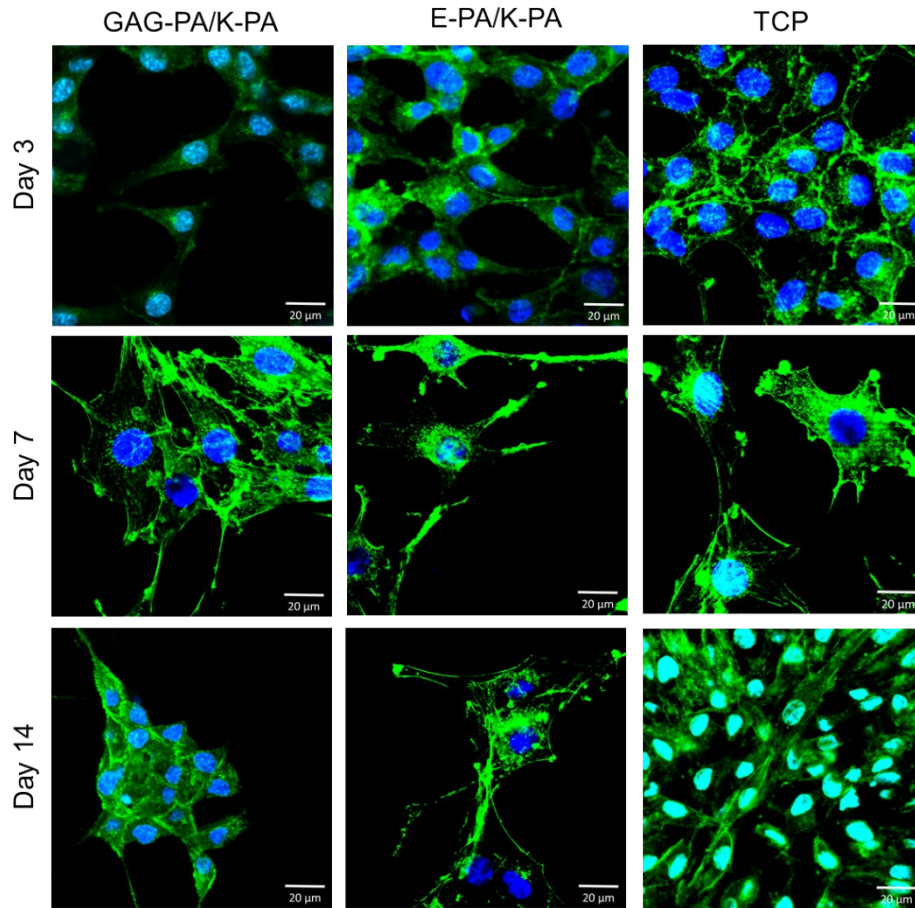

**Fig. S7.** F-actin filaments stained with phalloidin (green) showing actin networks formed by rMSCs on PA nanofibers and TCP. Nuclei were stained with TO-PRO-3 reagent (blue). Scale bars are 20 μm.

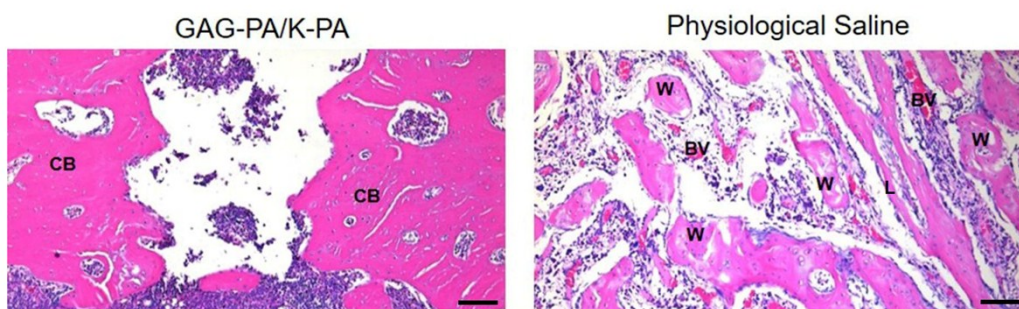

**Fig. S8.** Histological evaluation of rabbit tibial defects after 4 weeks of GAG-PA gel treatment. Tissue sections of GAG-PA gel and physiological saline control groups were stained with H&E. Scale bars are 100 μm. (CB: Cortical bone, W: Woven bone, L: Lamellar bone, BV: Blood vessel).
